# Supplementary material for: Adaptive immunity to SARS-CoV-2 in cancer patients: The CAPTURE study
Source: bioRxiv or medRxiv preprint supplement (doi:10.1101/2020.12.21.20248608), 2020-12-23
Supplement: Supplementary file [file media-1.pdf]

**A**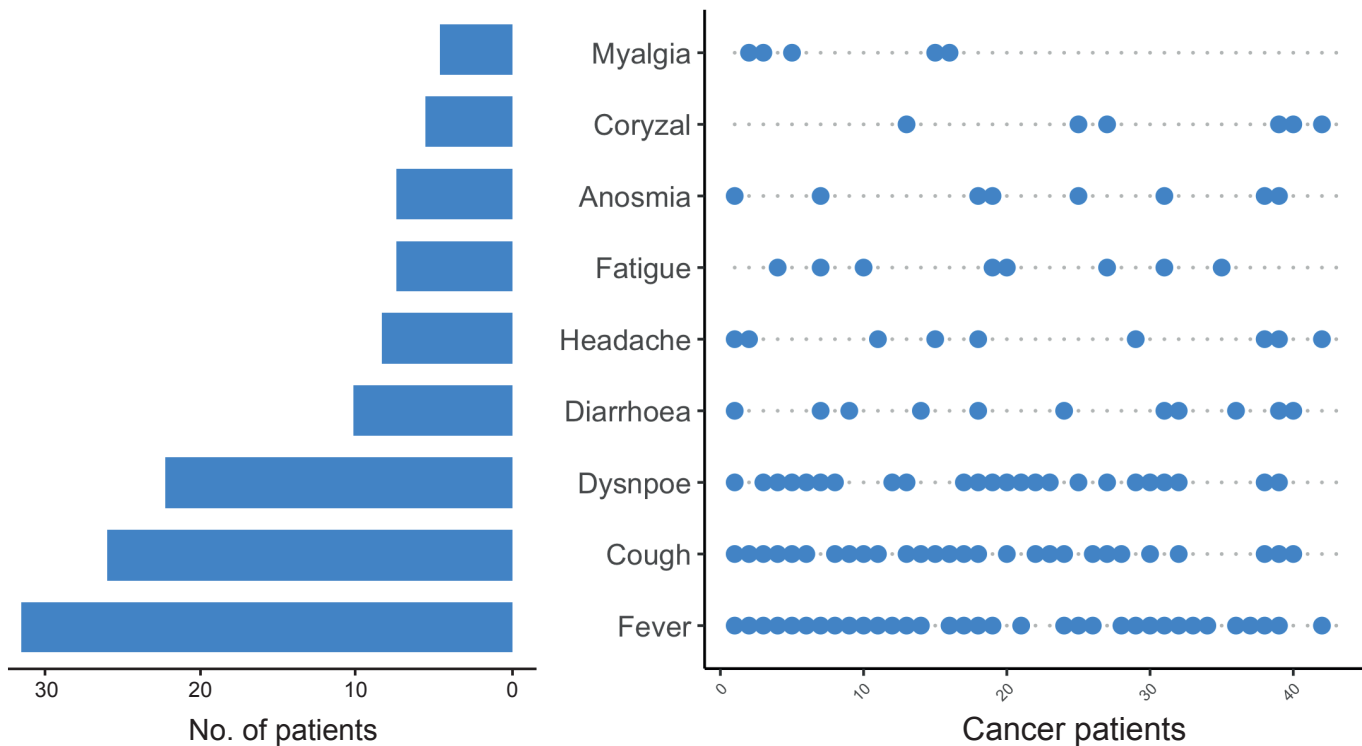**B**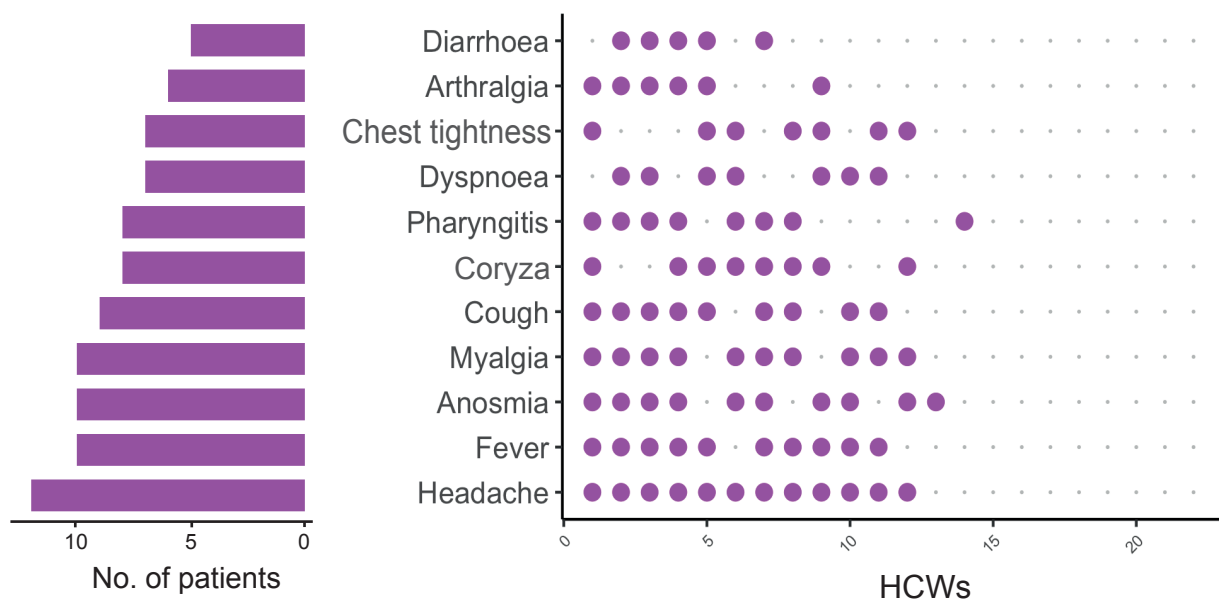

Figure S1

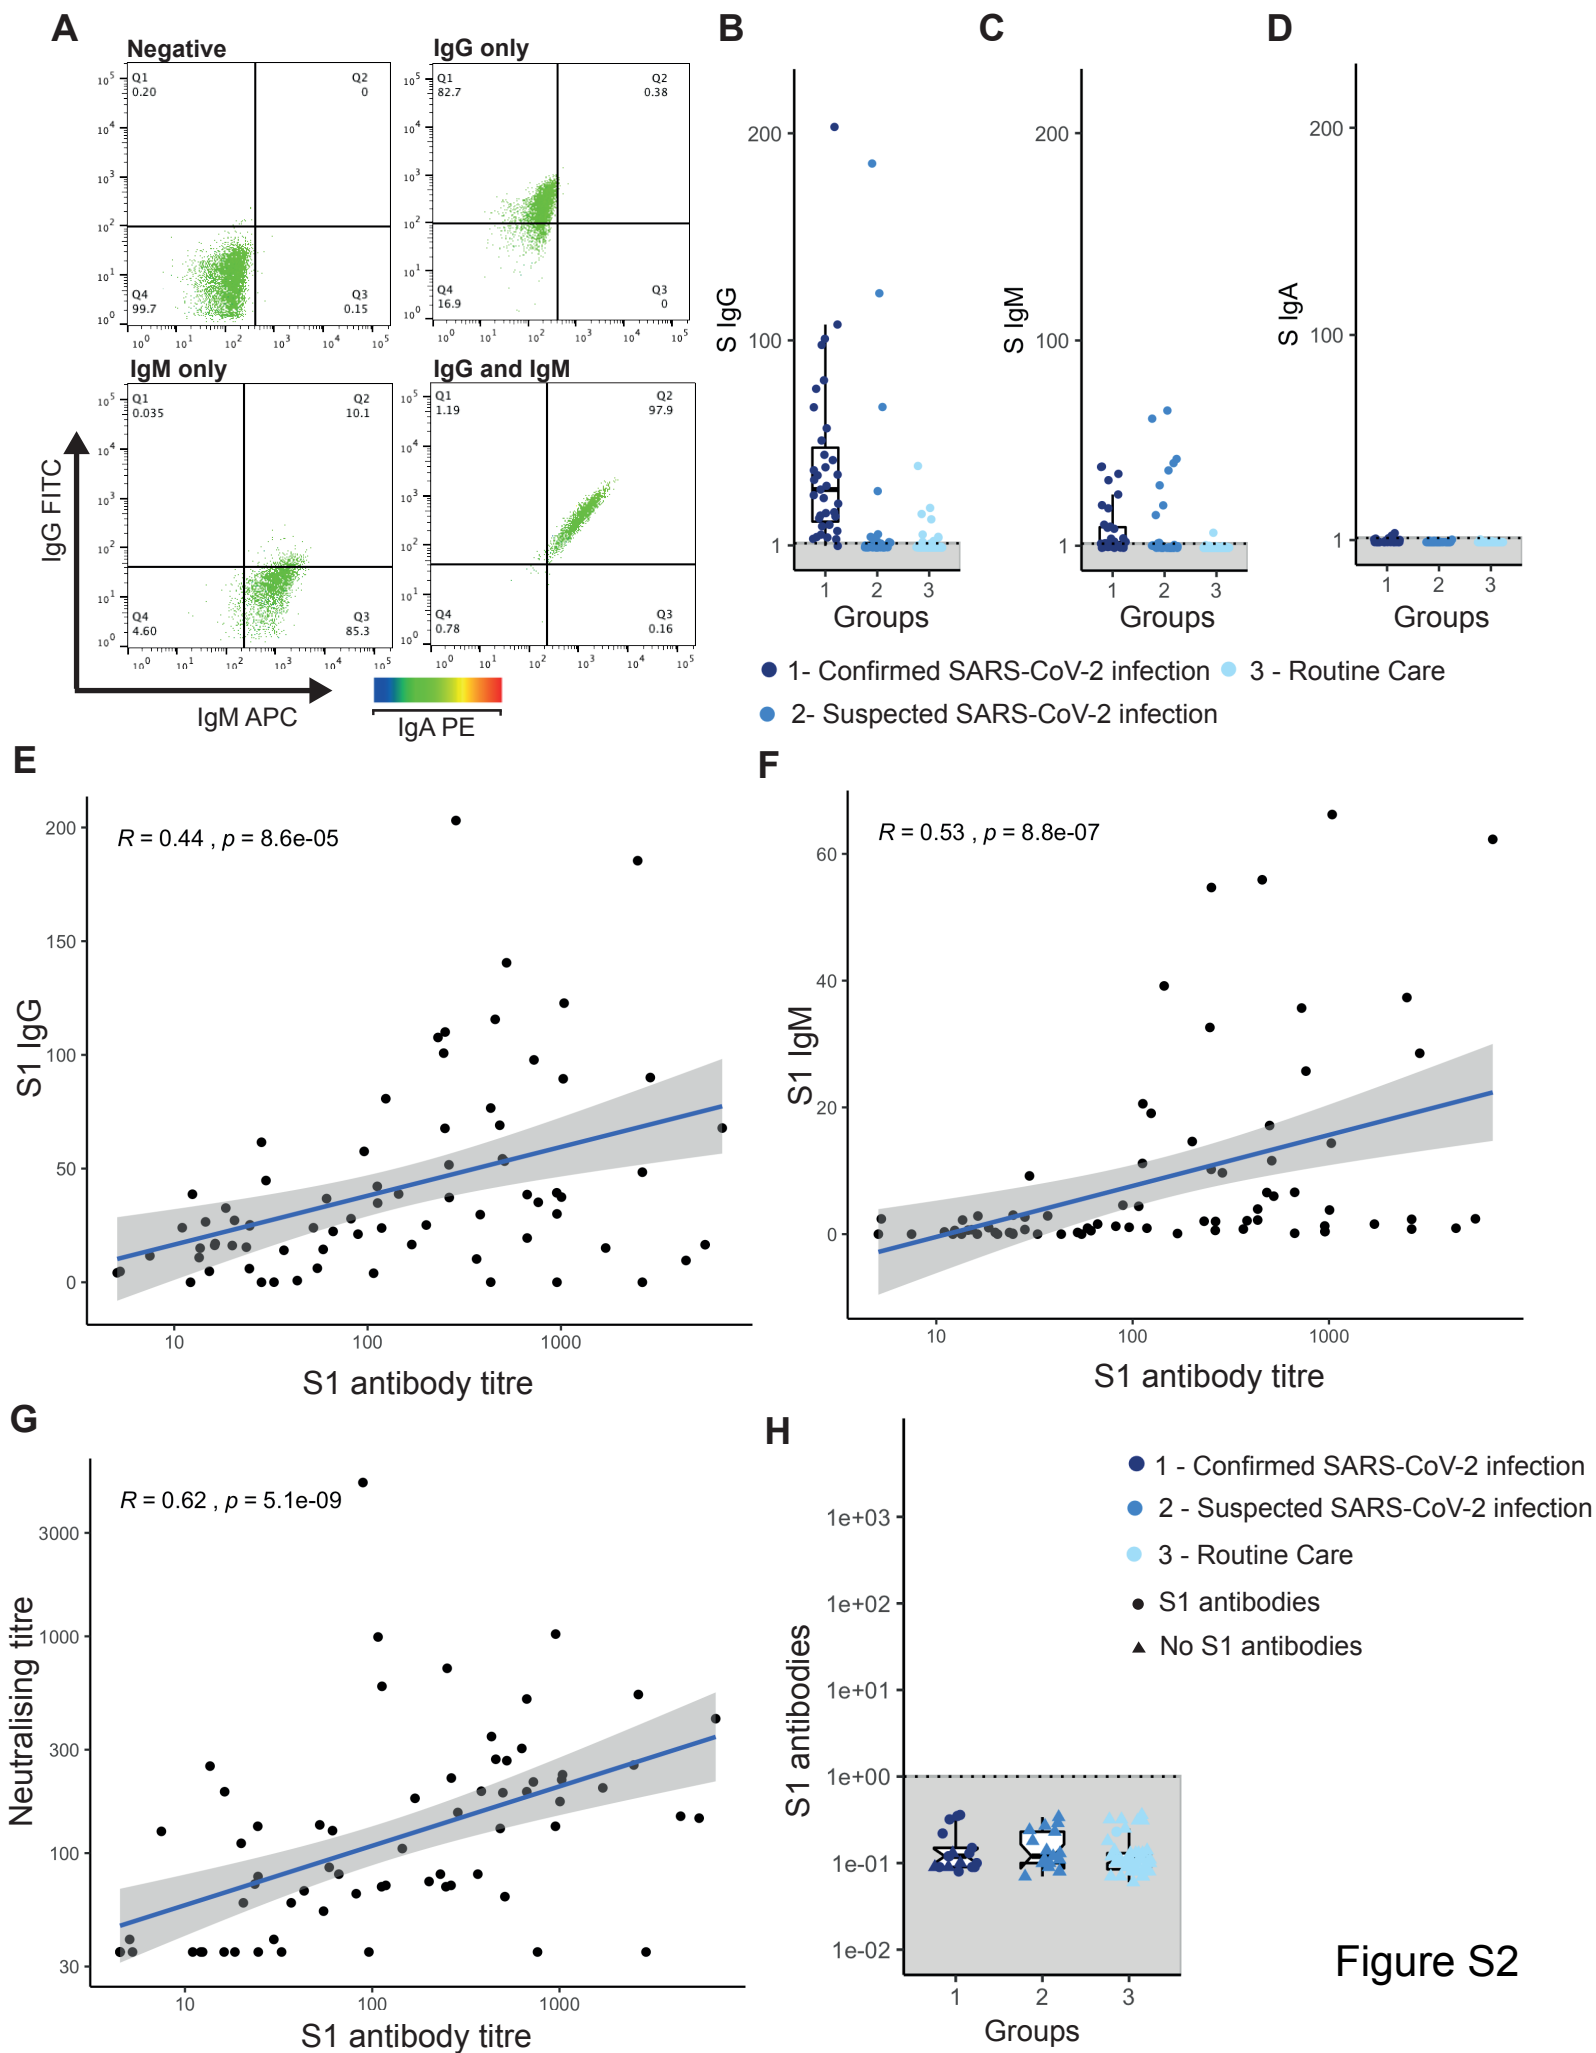

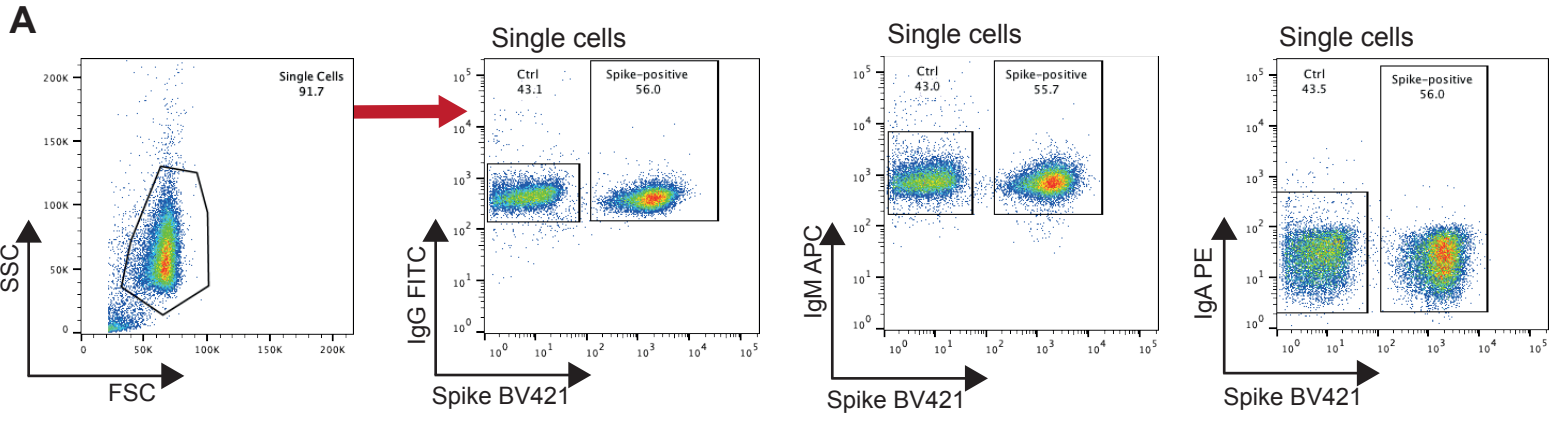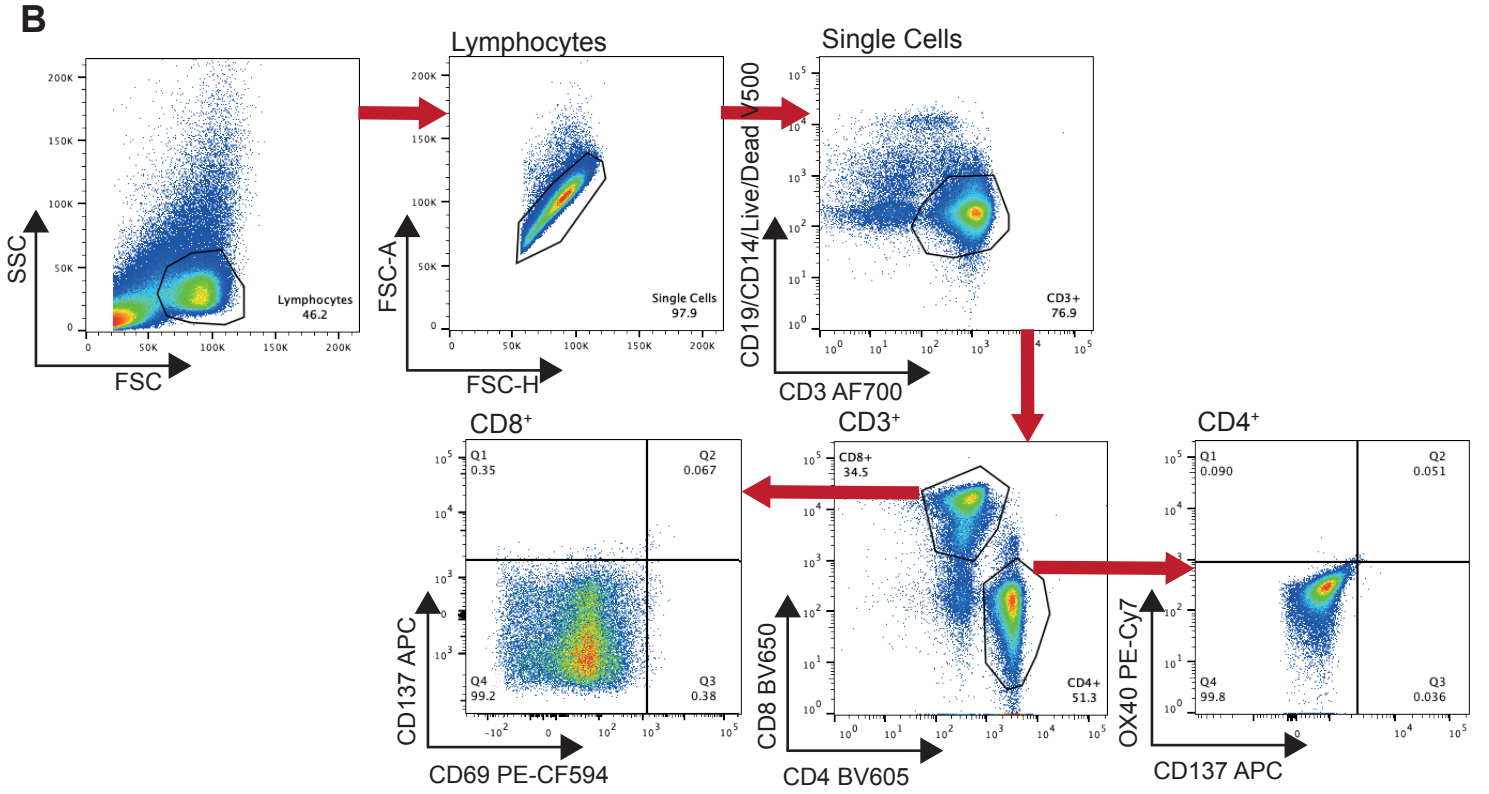

Figure S3

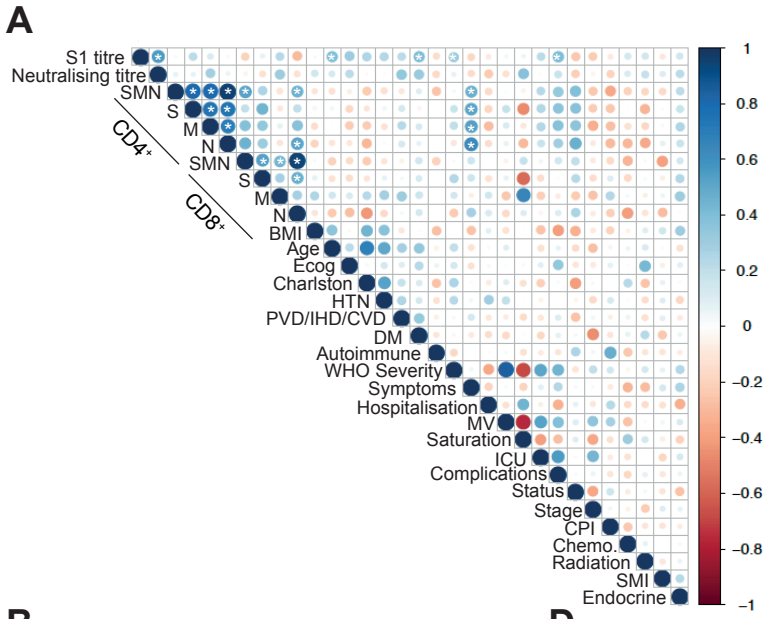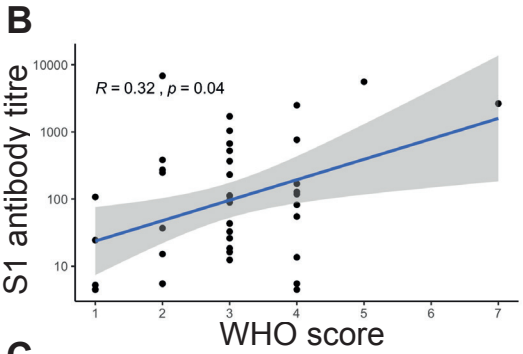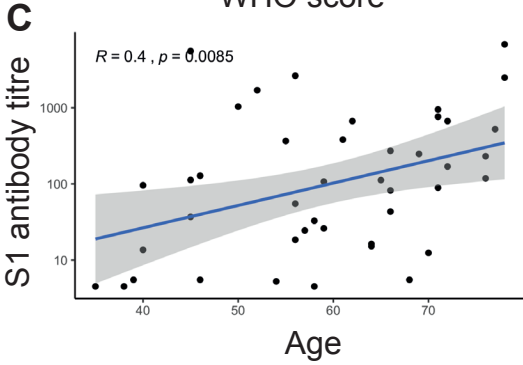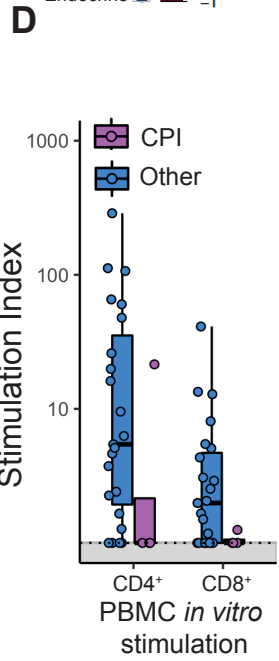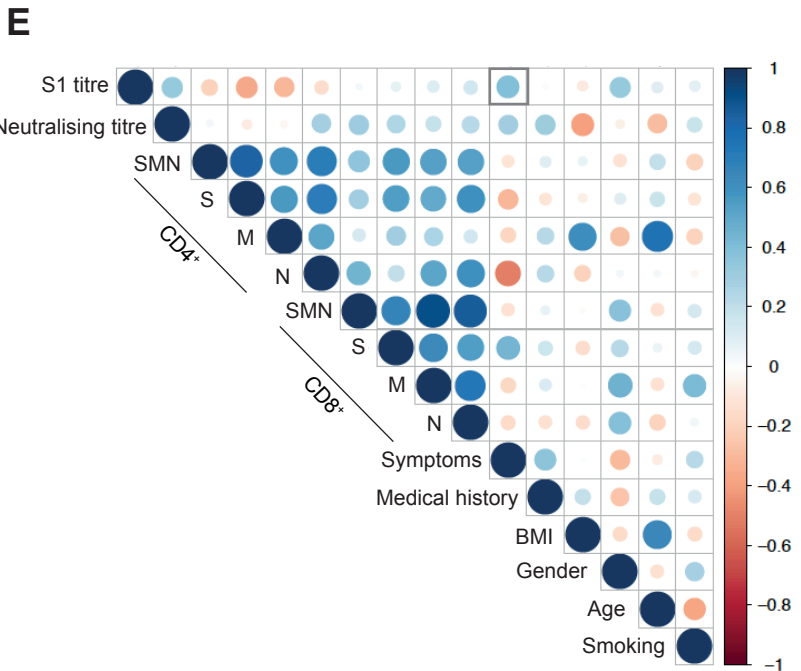

Figure S4

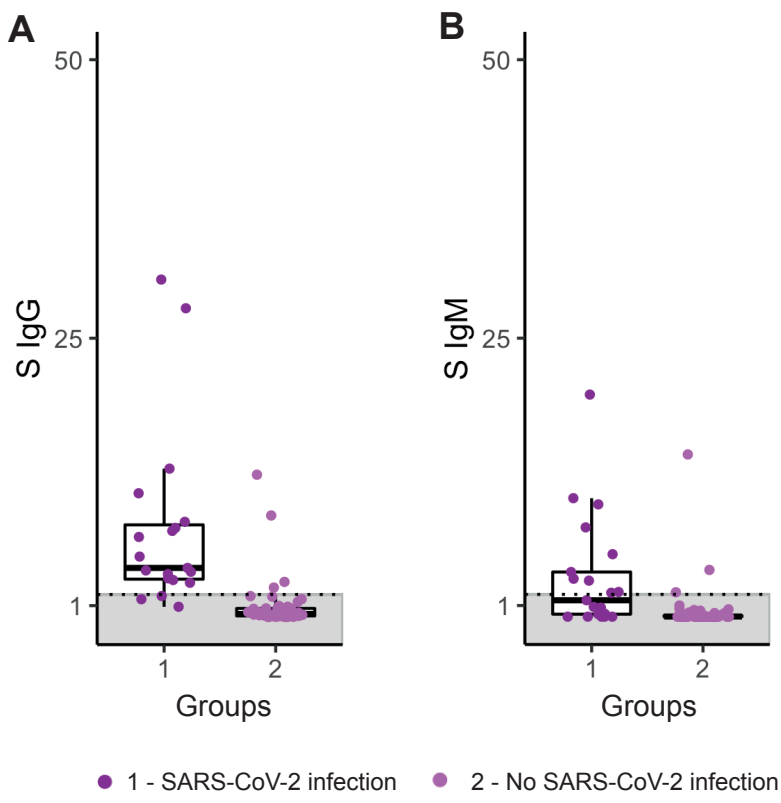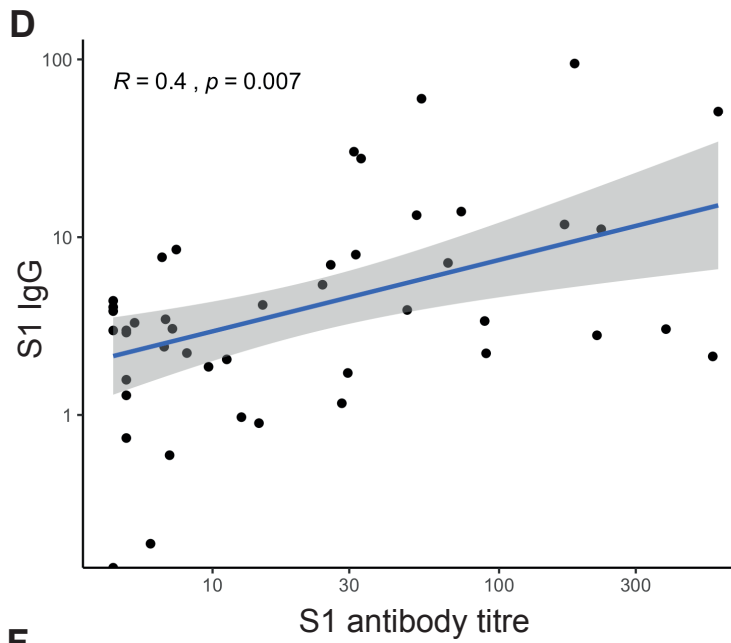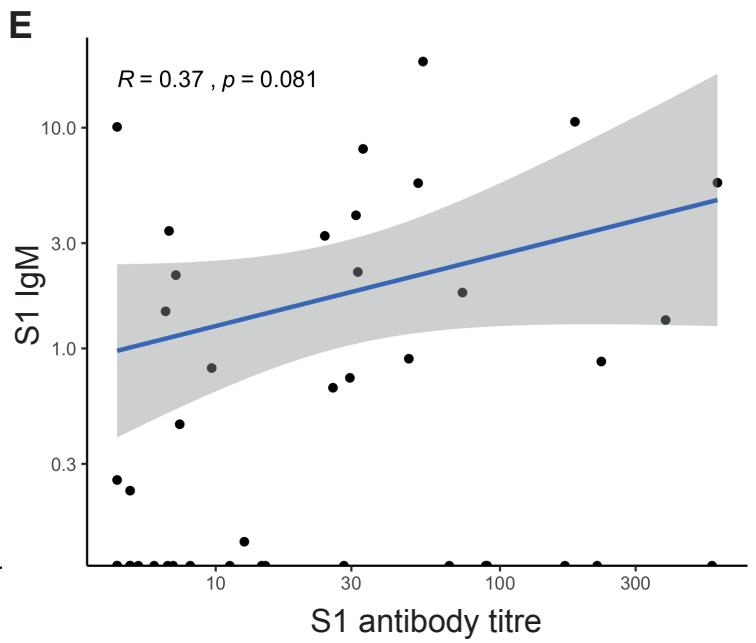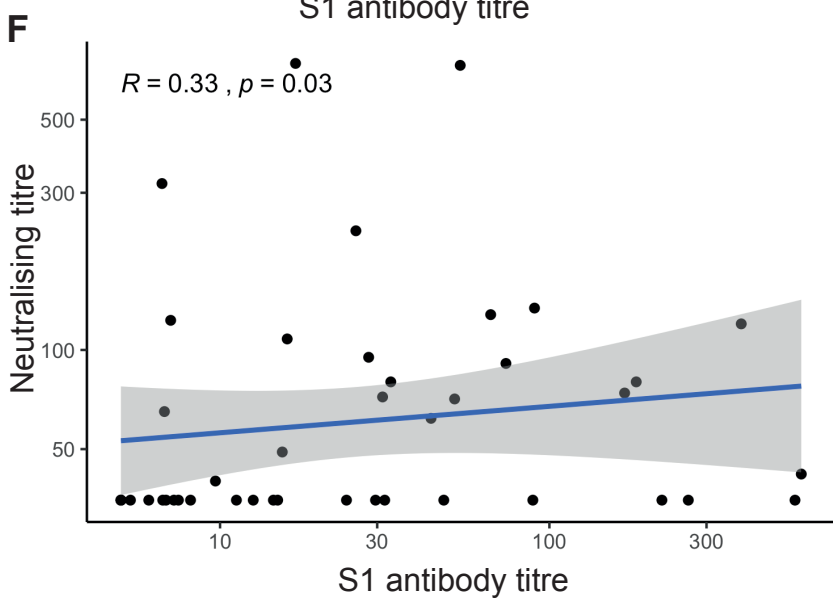

Figure S5

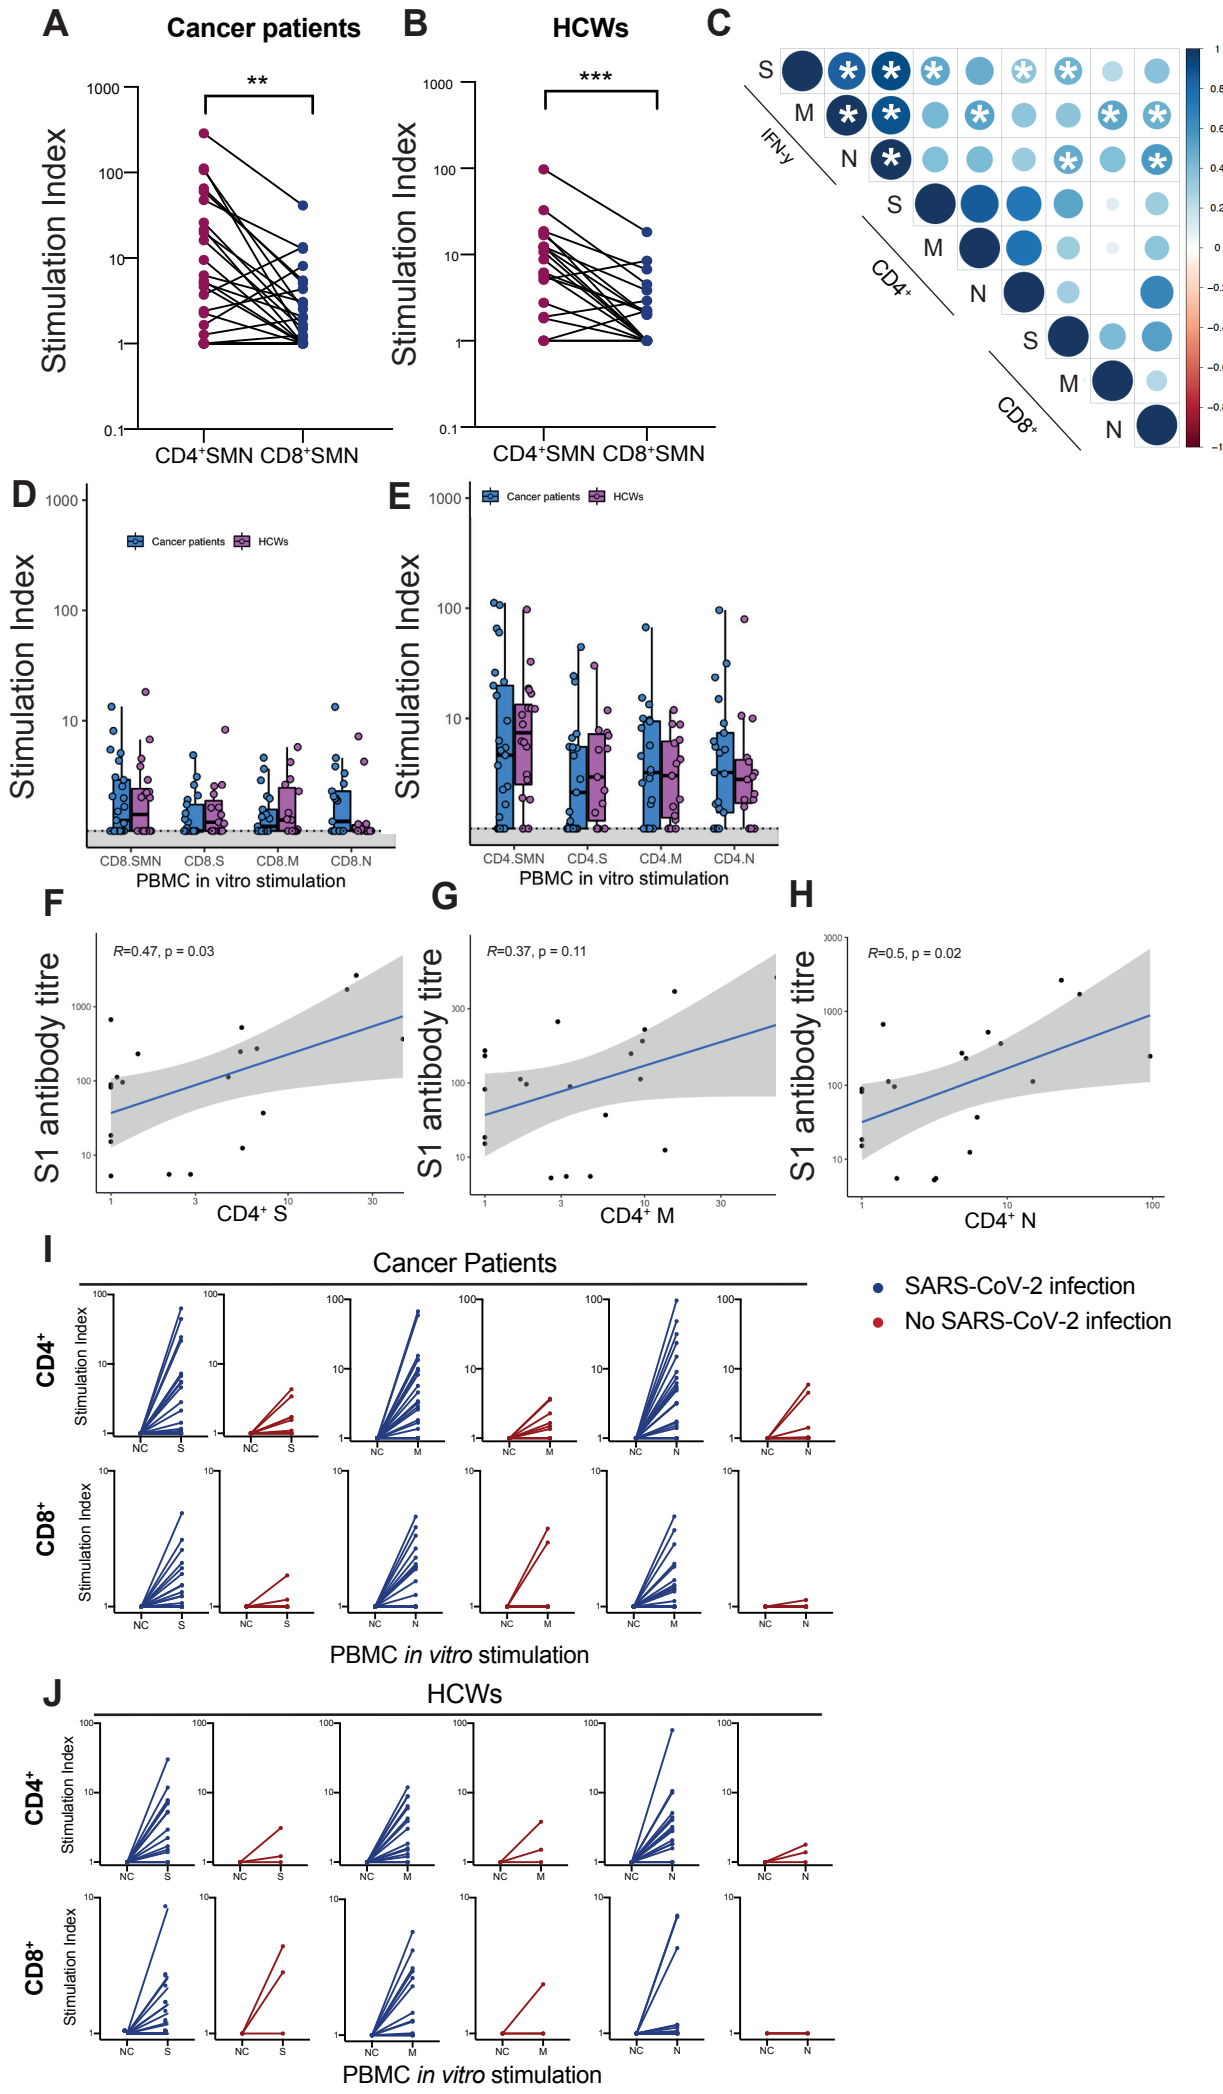

Figure S6

**Table S1:** Baseline characteristics of CAPTURE participants, including cancer patients with suspected COVID-19 (Group A), cancer patients recruited in routine care (Group B) and healthcare worker volunteers.

|                                                  | <b>Groups A, B</b>  | <b>Group A</b>   | <b>Group B</b>   | <b>Group C</b> |                      |
|--------------------------------------------------|---------------------|------------------|------------------|----------------|----------------------|
| <b>Cohort Characteristics, n (%)<sup>a</sup></b> | n =144 <sup>a</sup> | n=74             | n=70             | n = 64/73      | p-value <sup>b</sup> |
| Age                                              |                     |                  |                  |                |                      |
| 18-35                                            | 7 (5)               | 4 (5)            | 3 (4)            | 25 (39)        |                      |
| 36-45                                            | 15 (10)             | 10 (14)          | 5 (7)            | 18 (24)        | <b>&lt;0.001</b>     |
| 46- 65                                           | 27 (19)             | 12 (16)          | 15 (21)          | 17 (27)        |                      |
| >65                                              | 95 (66)             | 48 (65)          | 47 (67)          | 4 (6)          |                      |
| Male                                             | 69 (48)             | 34 (46)          | 35 (50)          | 15 (23)        | <b>&lt;0.01</b>      |
| <b>Cancer diagnosis</b>                          |                     |                  |                  |                |                      |
| Skin                                             | 38 (26)             | 2 (3)            | 36 (51)          | -              |                      |
| Urology                                          | 27 (19)             | 6 (8)            | 21 (30)          | -              |                      |
| Gastrointestinal                                 | 23 (16)             | 22 (30)          | 1 (1)            | -              |                      |
| Breast                                           | 15 (10)             | 15 (20)          | 0 (0)            | -              | <b>&lt;0.001</b>     |
| Haematological                                   | 10 (7)              | 9 (12)           | 1 (1)            | -              |                      |
| Gynaecological                                   | 9 (6)               | 4 (5)            | 5 (7)            | -              |                      |
| Lung                                             | 9 (6)               | 8 (11)           | 1 (1)            | -              |                      |
| Sarcoma                                          | 9 (6)               | 4 (5)            | 5 (7)            | -              |                      |
| Other <sup>c</sup>                               | 4 (3)               | 4 (5)            | 0 (0)            | -              |                      |
| <b>Cancer stage<sup>d</sup></b>                  |                     |                  |                  |                |                      |
| Stage I-II                                       | 5 (4)               | 4 (5)            | 1 (1)            | -              |                      |
| Stage III                                        | 30 (21)             | 10 (14)          | 20 (29)          | -              | 0.06                 |
| Stage IV                                         | 99 (69)             | 51 (69)          | 48 (69)          | -              |                      |
| Haematological                                   | 10 (7)              | 9 (12)           | 1 (1)            | -              |                      |
| <b>Duration of Follow up, days, median (IQR)</b> | 135 (104- 159)      | 148.5 (112- 177) | 127.5 (104- 202) | 82(55-97)      | <b>&lt;0.001</b>     |

a, Expressed as number and percent of affected individuals unless otherwise specified. Denominators reflect available data; unless specified, unknowns are not included; b, Significance tests: Chi-squared test of categorical variables and Mann-Whitney U test for comparison of median values. Significance threshold  $p < 0.05$ .; c, Other cancer types include: head and neck cancers (n=2), glioblastoma, thymic carcinoma; d, Cancer stage at enrolment according to AJCC stage definition. IQR, interquartile range.

**Table S2:** Baseline characteristics and clinical course in laboratory confirmed SARS-CoV-2 patients, patients with clinical suspicion of COVID-19 but negative for SARS-CoV-2, and patients recruited in routine clinical care.

|                                | Cancer patients<br>n= 144 <sup>b</sup> | Group A + B<br>SARS-Cov2<br>positive <sup>a</sup><br>n= 43 | Group A<br>SARS-CoV2 <sup>a</sup><br>negative<br>n= 33 | Group B<br>SARS-CoV<br>negative <sup>a</sup><br>n= 68 | p-value <sup>c</sup> |
|--------------------------------|----------------------------------------|------------------------------------------------------------|--------------------------------------------------------|-------------------------------------------------------|----------------------|
| <b>DEMOGRAPHICS</b>            |                                        |                                                            |                                                        |                                                       |                      |
| Age, years (median, IQR)       | 58.9 (28-82)                           | 59.4 (38- 78)                                              | 57.6 (28- 78)                                          | 59.1 (28- 82)                                         | 0.954                |
| Male, n (%)                    | 69 (47.9)                              | 21 (48.9)                                                  | 14 (42.4)                                              | 34 (50)                                               | 0.766                |
| <b>PAST MEDICAL HISTORY</b>    |                                        |                                                            |                                                        |                                                       |                      |
| HTN                            | 38 (26)                                | 10 (24))                                                   | 5 (15)                                                 | 23 (33)                                               | 0.182                |
| PVD/IHD/CVD                    | 12 (8)                                 | 3 (7)                                                      | 6 (18)                                                 | 3 (4)                                                 | 0.058                |
| Diabetes Mellitus              | 15 (10)                                | 8 (20)                                                     | 2 (6)                                                  | 5 (7)                                                 | 0.057                |
| Obesity (BMI ≥30)              | 24 (17)                                | 11 (26)                                                    | 8 (24)                                                 | 25 (17)                                               | 0.308                |
| Inflammatory/autoimmune        | 11 (8)                                 | 1 (2)                                                      | 3 (9)                                                  | 7 (10)                                                | 0.677                |
| <b>Smoking History</b>         |                                        |                                                            |                                                        |                                                       |                      |
| Current smoker                 | 44 (31)                                | 15 (37)                                                    | 12 (36)                                                | 17 (24)                                               | 0.474                |
| Ex-smoker                      | 71 (49)                                | 18 (44)                                                    | 12 (36)                                                | 41 (59)                                               |                      |
| Never smoker                   | 22 (15)                                | 5 (12)                                                     | 7 (21)                                                 | 10 (14)                                               |                      |
| Unknown                        | 7 (5)                                  | 3 (7)                                                      | 2 (6)                                                  | 2 (3)                                                 |                      |
| <b>ONCOLOGICAL HISTORY</b>     |                                        |                                                            |                                                        |                                                       |                      |
| <b>Cancer diagnosis, n (%)</b> |                                        |                                                            |                                                        |                                                       |                      |
| Skin                           | 38 (26)                                | 0 (0)                                                      | 2 (6)                                                  | 36 (51)                                               | <b>&lt;0.001</b>     |
| Urology                        | 27 (19)                                | 4 (10)                                                     | 2 (6)                                                  | 21 (30)                                               |                      |
| Gastrointestinal               | 23 (16)                                | 13 (32)                                                    | 9 (27)                                                 | 1 (1)                                                 |                      |
| Breast                         | 15 (10)                                | 8 20)                                                      | 7 (21)                                                 | 0 (0)                                                 |                      |
| Haematological                 | 10 (7.0)                               | 5 (12)                                                     | 4 (12)                                                 | 1 (1)                                                 |                      |
| Gynaecological                 | 9 (6)                                  | 2 (5)                                                      | 2 (6)                                                  | 5 (7)                                                 |                      |
| Lung                           | 9 (6)                                  | 5 (12)                                                     | 3 (9)                                                  | 1 (1)                                                 |                      |
| Sarcoma                        | 9 (6)                                  | 1 (2)                                                      | 3 (9)                                                  | 5 (7)                                                 |                      |
| Other                          | 4 (3)                                  | 3 (7)                                                      | 1 (3)                                                  | 0 (0)                                                 |                      |



|                                         |               |               |               |               |        |        |
|-----------------------------------------|---------------|---------------|---------------|---------------|--------|--------|
| <b>Cancer stage<sup>d</sup>, n (%)</b>  |               |               |               |               |        |        |
| Stage I-II                              | 5 (4)         | 2 (5)         | 2 (6)         | 1 (1)         | 0.056  |        |
| Stage III                               | 30 (21)       | 7 (17)        | 3 (9)         | 20 (29)       |        |        |
| Stage IV                                | 99 (69)       | 27 (66)       | 24 (72)       | 48 (69)       |        |        |
| Haematological                          | 10 (7)        | 5 (12)        | 4 (12)        | 1 (1)         |        |        |
| <b>Treatment within 12 weeks, n (%)</b> |               |               |               |               |        |        |
| SACT, any                               | 113 (78)      | 35 (81)       | 27 (82)       | 51 (75)       | <0.001 |        |
| Chemotherapy                            | 57 (31)       | 28 (46)       | 22 (49)       | 7 (9)         |        |        |
| Small Molecule Inhibitor                | 41 (22)       | 12 (20)       | 5 (11)        | 5 (11)        |        |        |
| Anti-PD1/PDL1                           | 22 (12)       | 1 (2)         | 3 (7)         | 18 (23)       |        |        |
| Anti-PD1 & anti-CTLA4                   | 15 (8)        | 1 (2)         | 1 (2)         | 13 (17)       |        |        |
| CPI combination, other                  | 9 (5)         | 2 (3)         | 1 (2)         | 6 (8)         |        |        |
| Radiotherapy                            | 18 (10)       | 7 (12)        | 8 (18)        | 3 (4)         |        |        |
| Surgery                                 | 8 (4)         | 2 (3)         | 4 (9)         | 2 (3)         |        |        |
| Endocrine Therapy                       | 6 (3)         | 5 (8)         | 1 (2)         | 0 (0)         |        |        |
| None                                    | 5 (3)         | 1 (2)         | 0 (0)         | 4 (5)         |        |        |
| Other                                   | 4 (2)         | 2 (3)         | 0 (0)         | 2 (3)         |        |        |
| <b>Cancer status<sup>e</sup>, n (%)</b> |               |               |               |               |        |        |
| <b>Solid cancer, advanced (n = 99)</b>  | <b>n = 99</b> | <b>n = 27</b> | <b>n = 24</b> | <b>n = 48</b> |        | <0.001 |
| Resected, NED                           | 7 (7)         | 1 (4)         | 0 (0)         | 6 (13)        |        |        |
| SACT, CR/PR                             | 29 (29)       | 5 (19)        | 3 (13)        | 21 (44)       |        |        |
| SACT, SD                                | 32 (32)       | 14 (52)       | 6 (25)        | 12 (25)       |        |        |
| SACT, PD                                | 31 (31)       | 7 (26)        | 15 (62.5)     | 9 (19)        |        |        |
| <b>Solid cancer, localised (n=35)</b>   | <b>n = 35</b> | <b>n = 9</b>  | <b>n = 5</b>  | <b>n = 21</b> | 0.731  |        |
| Resected, NED                           | 8 (23)        | 3 (33)        | 1 (20)        | 4 (19)        |        |        |
| (Neo-) adjuvant SACT                    | 17 (49)       | 2 (22)        | 3 (60)        | 12 (57)       |        |        |
| Radical CRT                             | 1 (3)         | 1 (11)        | 0 (0)         | 0 (0)         |        |        |
| SACT, CR/PR                             | 5 (14)        | 1 (11)        | 1 (20)        | 3 (14)        |        |        |
| SACT, SD                                | 2 (6)         | 1 (11)        | 0 (0)         | 1 (5)         |        |        |
| SACT, PD                                | 2 (6)         | 1 (11)        | 0 (0)         | 1 (5)         |        |        |
| <b>Haematological, (n= 10)</b>          | <b>n = 10</b> | <b>n = 5</b>  | <b>n = 4</b>  | <b>n = 1</b>  | 0.331  |        |
| SACT, in remission                      | 5 (50)        | 3 (60)        | 1 (25)        | 1 (100)       |        |        |
| SACT, stable active disease             | 2 (20)        | 0 (0)         | 2 (50)        | 0 (0)         |        |        |

|                                        |                |               |                |               |                  |
|----------------------------------------|----------------|---------------|----------------|---------------|------------------|
| SACT, progressive disease              | 3 (30)         | 2 (40)        | 1 (25)         | 0 (0)         |                  |
| <b>CLINICAL OUTCOMES &amp; IMPACT</b>  |                |               |                |               |                  |
| Duration of follow-up, median (IQR)    | 135 (104- 159) | 147 (96- 153) | 177 (126- 182) | 104 (68- 149) | <b>0.001</b>     |
| <b>At data cutoff</b>                  |                |               |                |               |                  |
| Deceased, yes                          | 17 (12)        | 4 (10)        | 12 (36)        | 1 (1)         | <b>&lt;0.001</b> |
| Primary cause death:                   |                |               |                |               |                  |
| Progressive Cancer                     | 15 (10)        | 4 (10)        | 10 (30)        | 1 (1)         |                  |
| Complications of COVID-19 <sup>f</sup> | 0 (0)          | 0 (0)         | 0 (0)          | 0 (0)         | 0.623            |
| Other                                  | 2 (1)          | 0 (0)         | 2 (6)          | 0 (0)         |                  |
| <b>Impact on cancer treatment</b>      |                |               |                |               |                  |
| Delay of treatment                     | 44 (31)        | 26 (61)       | 5 (15)         | 14 (20)       |                  |
| Dose modification or change of therapy | 8 (6)          | 4 (9)         | 2 (6)          | 2 (3)         | <b>&lt;0.001</b> |
| Premature discontinuation              | 1 (1)          | 0 (0)         | 0 (0)          | 1 (1)         |                  |

a, Indicates positive/negative for SARS-CoV2 by laboratory definition; b, Expressed as number and percent of affected individuals unless otherwise specified. Denominators reflect available data; unless specified, unknowns are not included; c, Significance tests: Chi-squared test of categorical variables and Mann-Whitney U test for comparison of median values; d, Cancer stage at enrolment according to AJCC stage definition; e, Cancer status as defined by RECIST v2.2 criteria; f, One patient dies within 30 days of PCR positivity, but not due to COVID-19  
 BMI, body mass index; CPI, checkpoint inhibitor; CR, complete response; CRT, chemoradiotherapy; CTLA-4, cytotoxic T-lymphocyte-associated protein 4; HTN, hypertension; PD, progressive disease; PR, partial response; PVD, peripheral vascular disease; IHD, ischaemic heart disease; CVD, cerebrovascular disease; IQR, interquartile range; NED, no evidence of disease; SACT, systemic anti-cancer therapy; SD, stable disease; PD1, programmed death 1; PDL1, programmed death ligand 1.

**Table S3:** Baseline characteristics professional role and work environment of healthcare volunteers

|                               | Group C, n=73          |                          |                         | p-value <sup>c</sup> |
|-------------------------------|------------------------|--------------------------|-------------------------|----------------------|
|                               | All                    | SARS-CoV2 + <sup>a</sup> | SARS-CoV2- <sup>a</sup> |                      |
| <b>PROFILES Completion</b>    | n = 64/73 <sup>b</sup> | n= 20/22                 | n= 44/51                |                      |
| Age                           |                        |                          |                         |                      |
| 18-35                         | 25 (39)                | 5 (20)                   | 20 (45.5)               | 0.06                 |
| 36-45                         | 18 (24)                | 7 (80)                   | 11 (25.0)               |                      |
| 46- 65                        | 17 (27)                | 5 (25)                   | 12 (45.4)               |                      |
| >65                           | 4 (6)                  | 3 (15)                   | 1 (2.3)                 |                      |
| Male                          | 15 (23)                | 4 (20)                   | 9 (20.5)                | 1                    |
| Smoking                       |                        |                          |                         |                      |
| Current                       | 1 (2)                  | 0 (0)                    | 1 (2.3)                 | 0.782                |
| Previous                      | 18 (28)                | 6 (30)                   | 12 (27.2)               |                      |
| Never                         | 35 (55)                | 14 (70)                  | 31 (70.4)               |                      |
| <b>PAST MEDICAL HISTORY</b>   | n= 63                  | n=19                     | n = 44                  |                      |
| prev_illness, yes             | 21 (33)                | 5 (26.3)                 | 16 (36.4)               | 0.627                |
| Obese                         | 11 (17)                | 6 (31.6)                 | 5 (11.6)                | 0.114                |
| HTN                           | 2 (3)                  | 0 (0)                    | 2 (4.5)                 | 0.871                |
| CAD                           | 0 (0)                  | 0 (0)                    | 0 (0)                   | -                    |
| Stent                         | 0 (0)                  | 0 (0)                    | 0 (0)                   | -                    |
| Hypercholesterolaemia         | 2 (3)                  | 0 (0)                    | 2 (4.5)                 | 0.871                |
| CVD                           | 0 (0)                  | 0 (0)                    | 0 (0)                   | -                    |
| DVT                           | 0 (0)                  | 0 (0)                    | 0 (0)                   | -                    |
| PE                            | 0 (0)                  | 0 (0)                    | 0 (0)                   | -                    |
| NIDMM                         | 0 (0)                  | 0 (0)                    | 0 (0)                   | -                    |
| IDMM                          | 0 (0)                  | 0 (0)                    | 0 (0)                   | -                    |
| Hyperthyroidism               | 0 (0)                  | 0 (0)                    | 0 (0)                   | -                    |
| Hypothyroidism                | 4 (6)                  | 1 (5.2)                  | 3 (6.8)                 | 1                    |
| CKD                           | 0 (0)                  | 0 (0)                    | 0 (0)                   | -                    |
| COPD                          | 0 (0)                  | 0 (0)                    | 0 (0)                   | -                    |
| Asthma                        | 4 (6)                  | 1 (5.2)                  | 3 (6.8)                 | 1                    |
| <b>ROLE &amp; ENVIRONMENT</b> | n = 64                 | n = 20                   | n = 44                  |                      |
| Patient facing role, yes      | 58 (91)                | 18 (90)                  | 40 (91)                 | 1                    |
| Work environment              |                        |                          |                         |                      |
| ICU                           | 8 (13)                 | 6 (30)                   | 2 (5)                   | <b>0.014</b>         |
| Theatres                      | 2 (3)                  | 0 (0)                    | 2 (5)                   | 0.846                |
| Inpatients/ward               | 30 (47)                | 9 (45)                   | 21 (48)                 | 1                    |
| Outpatients                   | 37 (58)                | 11 (55)                  | 26 (59)                 | 1                    |
| Other                         | 4 (6)                  | 2 (10)                   | 2 (5)                   | 0.972                |
| COVID cohort area, yes        | 34 (53)                | 8 (44.4)                 | 26 (65)                 | 0.694                |
| Aerosol procedure, yes        | 8 (13)                 | 3 (16.7)                 | 5 (13)                  | 0.989                |
| Close colleague, positive     | 39 (61)                | 11 (55)                  | 28 (64)                 | 0.703                |
| Off-work isolation, yes       | 29 (45)                | 14 (70)                  | 15 (34)                 | <b>0.016</b>         |
| <b>SYMPTOMS</b>               | n = 64                 | n=20                     | n=44                    |                      |
| Fever                         | 16 (25)                | 10 (50)                  | 8 (18)                  | <b>0.035</b>         |
| Headache                      | 23 (36)                | 12 (60)                  | 14 (32)                 | 1                    |
| Coryzal illness               | 16 (25)                | 8 (40)                   | 11 (25)                 | 0.860                |
| Pharyngitis                   | 19 (30)                | 7 (35)                   | 12 (27)                 | 1                    |
| Anosmia                       | 12 (19)                | 10 (50)                  | 3 (7)                   | <b>&lt;0.001</b>     |
| Cough                         | 18 (28)                | 9 (45)                   | 10 (23)                 | 0.356                |

|                 |         |         |        |              |
|-----------------|---------|---------|--------|--------------|
| Dyspnoea        | 7 (11)  | 7 (35)  | 3 (7)  | <b>0.028</b> |
| Chest tightness | 7 (11)  | 7 (35)  | 2 (5)  | 0.057        |
| Diarrhoea       | 7 (11)  | 5 (25)  | 3 (7)  | 0.769        |
| Myalgia         | 15 (23) | 10 (50) | 6 (14) | <b>0.035</b> |
| Arthralgia      | 7 (11)  | 6 (30)  | 2 (5)  | <b>0.037</b> |
| Rash            | 1 (2)   | 0 (0)   | 1 (2)  | 1            |

a, Indicates positive/negative for SARS-CoV2 by laboratory definition ; b, 64 out of 73 participants in the healthcare worker completed baseline PROFILES questionnaire. Expressed as number and percent of affected individuals unless otherwise specified. Denominators reflect available data; unless specified, unknowns are not included; c, Significance tests: Chi-squared test of categorical variables and Mann-Whitney U test for comparison of median values. Significance threshold  $p < 0.05$ ; d, Volunteers may work in >1 environment. CAD, coronary artery disease; CKD, chronic kidney disease; COPD, chronic obstructive pulmonary disease; CVD, cerebrovascular disease; HTN, hypertension; ICU, intensive care unit

**Table S4: Patient and healthcare volunteer shielding practices and potential sources of transmission**

|                                  | Group A & B, n=144       |                          | p-value          | Group C, n= 73           |                          | p-value <sup>b</sup> |
|----------------------------------|--------------------------|--------------------------|------------------|--------------------------|--------------------------|----------------------|
|                                  | SARS-CoV2 + <sup>a</sup> | SARS-CoV2 - <sup>a</sup> |                  | SARS-CoV2 + <sup>a</sup> | SARS-CoV2 - <sup>a</sup> |                      |
| <b>PROFILES Completion</b>       |                          |                          |                  |                          |                          |                      |
| <b>LIFESTYLE &amp; SHIELDING</b> | n = 20 <sup>c</sup>      | n = 74 <sup>c</sup>      |                  | n=19 <sup>c</sup>        | n=44 <sup>c</sup>        |                      |
| Advised to shield, yes           | 19 (85)                  | 63 (85)                  | 0.426            | -                        | -                        | -                    |
| Time shielding                   |                          |                          |                  |                          |                          |                      |
| 0 days                           | 3 (15)                   | 15 (2)                   |                  | -                        | -                        | -                    |
| 1-14 days                        | 6 (30)                   | 2 (3)                    |                  | -                        | -                        | -                    |
| 14-28 days                       | 0 (0)                    | 2 (3)                    | <b>0.002</b>     | -                        | -                        | -                    |
| >28 days                         | 11 (55)                  | 55 (74)                  |                  | -                        | -                        | -                    |
| Household size <sup>d</sup>      |                          |                          |                  |                          |                          |                      |
| 1                                | 1 (5)                    | 18 (24)                  |                  | 5 (26)                   | 9 (21)                   |                      |
| 2-3                              | 10 (50)                  | 38 (51)                  | 0.075            | 9 (47)                   | 25 (57)                  | 0.886                |
| >=4                              | 9 (45)                   | 18 (24)                  |                  | 5 (26)                   | 10 (24)                  |                      |
| Household positive contact, yes  | 6 (30)                   | 0 (0)                    | <b>&lt;0.001</b> | 2 (11)                   | 1 (2)                    | 0.442                |

a, Indicates positive/negative for SARS-CoV2 by laboratory definition; b, Significance tests: Chi-squared test of categorical variables and Mann-Whitney U test for comparison of median values. Significance threshold  $p < 0.05$ ; c, Expressed as number and percent of affected individuals unless otherwise specified. Denominators reflect available data; unless specified, unknowns are not included; d, Household size inclusive of participant.

**Table S5: Clinical summary of ICU stay in 4 patients with confirmed SARS-CoV2 infection**

| Patient | Cancer Diagnosis     | Time in ICU (days) | Respiratory support                                                        | Reason for ICU admission                                                                                                    | Requirement for inotropes |
|---------|----------------------|--------------------|----------------------------------------------------------------------------|-----------------------------------------------------------------------------------------------------------------------------|---------------------------|
| CV0008  | T-ALL                | 1                  | Oxygen (nasal prongs, mask)                                                | In context of COVID-19: hypoxia, 8 days after having tested positive for SARS-CoV-2, also received tocilizumab at that time | No                        |
| CV0004  | Spindle cell sarcoma | 1                  | Oxygen (nasal prongs, mask)                                                | Not in context of COVID-19: post-op post VATS                                                                               | No                        |
| CV0037  | DLBCL                | 3                  | Oxygen (nasal prongs, mask)                                                | In context of COVID: hypoxia, 1 day after having tested positive for SARS-CoV-2, also received tocilizumab at that time     | No                        |
| CV0025  | Breast cancer        | 100                | Oxygen, NIV, mechanical ventilation (2 episodes: 1st 59 days, 2nd 30 days) | In context of COVID: hypoxia, tachypnoeic, 6 days after having tested positive for SARS-CoV-2, received noradrenaline       | Yes                       |

DLBCL, diffuse large B-cell lymphoma; ICU, intensive care unit; NIV, non-invasive ventilation; T-ALL, T-cell acute lymphoblastic leukaemia; VATS, video assisted thoracoscopic surgery

**Table S6: Univariate logistic regression analysis of severe COVID-19 outcomes and neutralizing response in cancer patients**

| Parameter                          | Severe COVID-19  |         | Hospital admission |         | ICU admission            |              | Complications           |              | Neutralizing Antibodies |         |
|------------------------------------|------------------|---------|--------------------|---------|--------------------------|--------------|-------------------------|--------------|-------------------------|---------|
|                                    | OR (CI)          | p-value | OR (CI)            | p-value | OR (CI)                  | p-value      | OR (CI)                 | p-value      | OR (CI)                 | p-value |
| Age                                | 1.01(0.96-1.08)  | 0.59    | 1.02(0.97-1.07)    | 0.54    | 0.95(0.85-1.05)          | 0.35         | 0.90(0.16-4.29)         | 0.54         | 1.04 (0.97-1.11)        | 0.28    |
| BMI                                | 1.02(0.91-1.14)  | 0.73    | 0.99(0.89-1.10)    | 0.91    | 0.85(0.57-1.08)          | 0.29         | <b>0.70(0.48-0.89)</b>  | <b>0.02</b>  | 1.16(0.99-1.44)         | 0.11    |
| ECOG                               | 1.39(0.47-4.33)  | 0.55    | 2.15(0.77-6.76)    | 0.16    | 1.61(0.24-11.62)         | 0.62         | <b>4.42(1.16-23.42)</b> | <b>0.046</b> | 0.84(0.24-1.94)         | 0.79    |
| Gender                             | 1.49(0.39-6.04)  | 0.56    | 1.92(0.57-6.72)    | 0.29    | NA                       | NA           | 1.76(0.37-9.69)         | 0.48         | 1.00(0.21-4.87)         | 1.00    |
| Smoking                            | 1.11(0.50-2.49)  | 0.80    | 1.35(0.66-2.86)    | 0.42    | 2.92(0.66-21.17)         | 0.21         | 1.10(0.44-2.79)         | 0.85         | 0.94(0.37-2.35)         | 0.89    |
| Cancer diagnosis                   | 1.22(0.96-1.60)  | 0.17    | 1.06(0.85-1.32)    | 0.68    | 1.33(0.86-2.43)          | 0.31         | 0.98(0.67-1.37)         | 0.92         | 1.01(0.77-1.35)         | 1.00    |
| Solid vs. hematological malignancy | 2.9(0.31-26.93)  | 0.32    | 2.57(0.30-54.54)   | 0.43    | <b>3.8(2.65-1090)</b>    | <b>0.01</b>  | 5.50(0.57-53.98)        | 0.12         | 0.18(0.02-1.80)         | 0.12    |
| Cancer status                      | 1.00(0.57-1.67)  | 0.99    | 0.74(0.43-1.20)    | 0.24    | 0.94(0.29-2.15)          | 0.90         | 1.26(0.69-2.24)         | 0.42         | 0.95(0.54-1.81)         | 0.86    |
| Stage                              | 3.39(1.03-16.17) | 0.07    | 2.12(0.83-6.51)    | 0.14    | 3.00(0.19-376.20)        | 0.65         | 1.04(0.69-2.24)         | 0.95         | 0.24(0.04-0.98)         | 0.08    |
| CPI, all combinations              | 0.85(0.04-7.48)  | 0.89    | 0.23(0.01-2.00)    | 0.22    | NA                       | NA           | NA                      | NA           | 0.18(0.02-1.80)         | 0.12    |
| Chemotherapy                       | 1.01(0.26-4.09)  | 0.99    | 2.22(0.65-7.92)    | 0.21    | NA                       | NA           | 0.67(0.14-3.24)         | 0.61         | 0.38(0.05-1.90)         | 0.27    |
| Small molecule inhibitor           | 0.68(0.09-3.46)  | 0.67    | 0.98(0.22-4.60)    | 0.99    | NA                       | NA           | 0.48(0.02-3.33)         | 0.52         | NA                      | NA      |
| Endocrine therapy                  | 3.11(0.50-19.63) | 0.21    | NA                 | NA      | 3.50(0.15-43.99)         | 0.34         | 0.85(0.04-6.55)         | 0.89         | 1.21(0.16-25.05)        | 0.87    |
| Radiotherapy                       | 4.67(0.86-28.20) | 0.07    | 2.24(0.42-17.07)   | 0.37    | <b>14.00(1.14-336.9)</b> | <b>0.047</b> | 4.65(0.74-28.40)        | 0.09         | 0.52(0.09-4.20)         | 0.49    |
| Surgery                            | NA               | NA      | 0.37(0.02-4.16)    | 0.43    | NA                       | NA           | NA                      | NA           | NA                      | 0.99    |
| No. of comorbidities               | 0.98(0.57-1.63)  | 0.94    | 0.99(0.63-1.57)    | 0.97    | 0.30(0.02-1.04)          | 0.16         | 1.45(0.82-2.70)         | 0.21         | 1.44(0.79-2.94)         | 0.26    |
| HTN                                | 1.71(0.37-7.38)  | 0.47    | 1.54(0.39-6.88)    | 0.55    | NA                       | NA           | 0.96(0.13-5.12)         | 0.97         | 2.92(0.43-58.23)        | 0.34    |
| PVD/IHD/CVD                        | 1.32(0.06-15.16) | 0.83    | NA                 | 0.99    | NA                       | NA           | 2.36(0.10-28.22)        | 0.51         | NA                      | 0.99    |
| Diabetes Mellitus                  | 0.83(0.11-4.37)  | 0.84    | 1.40(0.30-7.71)    | 0.67    | NA                       | NA           | 1.61(0.20-9.26)         | 0.61         | NA                      | NA      |
| Inflammatory/autoimmune            | NA               | NA      | NA                 | NA      | NA                       | NA           | NA                      | NA           | 0.21(0.01-5.79)         | 0.29    |
| Charlston comorbidity index        | 1.05(0.83-1.36)  | 0.69    | 1.15(0.93-1.46)    | 0.21    | 0.71(0.41-1.10)          | 0.15         | 1.04(0.79-1.40)         | 0.80         | 1.10(0.83-1.46)         | 0.50    |
| spO <sub>2</sub>                   | 0.30(0.01-0.68)  | 0.11    | 0.75(0.48-0.97)    | 0.09    | 0.83(0.55-1.16)          | 0.25         | 0.87(0.71-1.03)         | 0.13         | 1.19(0.99-1.50)         | 0.07    |
| HB at diagnosis                    | 0.99(0.95-1.04)  | 0.83    | 0.99(0.95-1.03)    | 0.62    | <b>0.90(0.78-0.98)</b>   | <b>0.049</b> | 0.97(0.92-1.02)         | 0.21         | 0.98(0.93-1.02)         | 0.37    |
| WBC at diagnosis                   | 0.77(0.50-1.00)  | 0.14    | 0.79(0.58-1.00)    | 0.12    | 0.47(0.13-0.97)          | 0.13         | 0.81(0.54-1.01)         | 0.25         | NA                      | NA      |
| Neutrophils at diagnosis           | 0.93(0.55-1.46)  | 0.76    | 0.78(0.49-1.18)    | 0.25    | 0.92(0.32-1.94)          | 0.84         | 0.84(0.46-1.37)         | 0.51         | 1.01(0.64-1.67)         | 0.95    |
| Platelets at diagnosis             | 0.99(0.98-1.00)  | 0.23    | 1.00(0.99-1.01)    | 0.75    | 0.97(0.94-1.00)          | 0.07         | 1.00(0.99-1.00)         | 0.35         | 1.00(0.99(1.01)         | 1.00    |
| CRP at diagnosis                   | 1.01(1.00-1.02)  | 0.07    | 1.02(1.00-1.06)    | 0.07    | 1.01(1.00-1.02)          | 0.15         | 1.01(1.00-1.01)         | 0.17         | 1.00(0.99-1.02)         | 0.44    |
| Creatinine at diagnosis            | 0.97(0.91-1.02)  | 0.27    | 0.98(0.94-1.03)    | 0.47    | 0.96(0.88-1.03)          | 0.25         | 0.96(0.89-1.01)         | 0.15         | 1.02(0.97-1.08)         | 0.53    |

|                                    |                 |      |                 |      |                  |      |                  |      |                  |      |
|------------------------------------|-----------------|------|-----------------|------|------------------|------|------------------|------|------------------|------|
| Respiratory frequency at diagnosis | 1.38(1.06-2.15) | 0.07 | 1.06(0.91-1.32) | 0.54 | 1.36(1.06-2.19)  | 0.08 | 1.09(0.93-1.33)  | 0.30 | 0.90(0.72-1.06)  | 0.23 |
| Heart rate at diagnosis            | 0.92(0.81-1.01) | 0.14 | 0.99(0.92-1.08) | 0.83 | 0.98(0.85-1.10)  | 0.79 | 0.92(0.81-1.02)  | 0.15 | 1.02(0.94-1.12)  | 0.67 |
| Systolic pressure at diagnosis     | 0.93(0.86-0.99) | 0.07 | 1.00(0.96-1.05) | 0.85 | 0.90(0.74-1.01)  | 0.14 | 0.98(0.98-1.03)  | 0.39 | 1.06(1.00-1.44)  | 0.08 |
| Diastolic pressure at diagnosis    | 0.91(0.79-1.00) | 0.10 | 0.98(0.91-1.05) | 0.62 | NA               | NA   | 0.97(0.88-1.05)  | 0.43 | 0.97(0.89-1.05)  | 0.46 |
| Temperature at diagnosis           | 1.27(0.53-3.14) | 0.58 | 2.17(0.90-6.45) | 0.12 | 2.55(0.77-11.13) | 0.15 | 1.08(0.43-2.68)  | 0.87 | 1.07(0.44-2.73)  | 0.88 |
| Lactate at diagnosis               | 1.58(0.45-7.73) | 0.49 | 0.5(0.85-1.05)  | 0.56 | 0.12(0.00-2.53)  | 0.39 | 3.06(0.77-26.71) | 0.19 | 3.36(0.63-71.44) | 0.29 |

Data are odds ratio with 97.5% CI in parentheses. ICU, Intensive Care Unit; ECOG, Eastern Cooperative Oncology Group; BMI, Body mass index; CPI, immune checkpoint inhibition; HTN, hypertension; PVD, Peripheral vascular disease ; IHD, Ischemic heart disease ; CVD, Cardiovascular disease ;spO2, ;HB, Haemoglobin; CRP, C-reactive protein, NA, No available; NS, non-significant.



**Table S7: Univariate logistic regression analysis of symptomatic COVID-19 and neutralising response in HCWs**

| Parameter        | Symptoms         |         | Neutralizing Antibody |         |
|------------------|------------------|---------|-----------------------|---------|
|                  | OR (CI)          | p-value | OR (CI)               | p-value |
| Age              | 10.52(0.14-1.55) | 0.52    | 1.42(0.51-4.67)       | 0.27    |
| BMI              | 0.95(0.75-1.18)  | 0.60    | 1.06(0.85-1.39)       | 0.61    |
| Gender           | 0.57(0.02-7.30)  | 0.75    | 0.66(0.02-6.93)       | 0.67    |
| Smoking          | 1.67(0.17-14.47) | 0.64    | 5.40(0.59-126.79)     | 0.19    |
| Work environment | 0.65(0.27-1.34)  | 0.27    | 1.01(0.52-1.97)       | 0.97    |
| COVID-19 area    | 0.67(0.07-5.53)  | 0.71    | 0.17(0.02-1.23)       | 0.10    |

Data are odds ratio with 97.5% CI in parentheses. BMI, Body mass index; NA, No available.

**Table S8:** Comparison of clinical characteristics between confirmed positive cancer patients and HCWs

| Clinical Characteristics             | Cancer patients,<br>SARS-CoV2 positive <sup>a</sup><br>n= 43 <sup>b</sup> | Group C,<br>SARS-CoV2 positive <sup>a</sup><br>n= 22 | p-value <sup>c</sup> |
|--------------------------------------|---------------------------------------------------------------------------|------------------------------------------------------|----------------------|
| Age                                  |                                                                           |                                                      |                      |
| 18-35                                | 0 (0)                                                                     | 5 (20)                                               |                      |
| 36-45                                | 8 (19)                                                                    | 7 (80)                                               | <b>&lt;0.001</b>     |
| 46- 65                               | 6 (14)                                                                    | 5 (25)                                               |                      |
| >65                                  | 29 (67)                                                                   | 3 (15)                                               |                      |
| Male                                 | 21 (49)                                                                   | 4 (20)                                               | <b>0.016</b>         |
| <b>Past medical history</b>          |                                                                           |                                                      |                      |
| HTN                                  | 10 (24)                                                                   | 0 (0)                                                | <b>&lt;0.001</b>     |
| PVD/IHD/CVD                          | 3 (7)                                                                     | 0 (0)                                                | <b>&lt;0.001</b>     |
| Diabetes Mellitus                    | 9 (19)                                                                    | 0 (0)                                                | <b>0.023</b>         |
| Obesity, BMI>30                      | 18 (42)                                                                   | 6 (32)                                               | 0.289                |
| Inflammatory/Autoimmune              | 1 (2)                                                                     | 0 (0)                                                | 1                    |
| <b>COVID-19 illness</b>              |                                                                           |                                                      |                      |
| <b>Symptoms</b>                      | n = 43/43                                                                 | n = 20/22                                            |                      |
| Fever                                | 34 (83)                                                                   | 10 (50)                                              | <b>&lt;0.001</b>     |
| Dyspnoea                             | 20 (47)                                                                   | 7 (35)                                               | 0.426                |
| Cough                                | 28 (65)                                                                   | 9 (45)                                               | 0.172                |
| Anosmia                              | 8 (19)                                                                    | 10 (50)                                              | <b>0.016</b>         |
| Myalgia                              | 13 (13)                                                                   | 10 (50)                                              | 0.164                |
| Coryzal illness                      | 6 (14)                                                                    | 8 (40)                                               | <b>0.028</b>         |
| Headache                             | 9 (21)                                                                    | 12 (60)                                              | <b>0.004</b>         |
| Diarrhoea                            | 11 (26)                                                                   | 5 (25)                                               | 1                    |
| Duration of symptoms, median (range) | 19 (1- 146)                                                               | 14 (3- 120)                                          | 0.306                |

a, Indicates positive/negative for SARS-CoV2 by laboratory definition; b, Expressed as number and percent of affected individuals unless otherwise specified. Denominators reflect available data; unless specified, unknowns are not included; c, Significance tests: Chi-squared test of categorical variables and Mann-Whitney U test for comparison of median values. Significance threshold p<0.05.
